# Supplementary material for: Are Frail Older People from Racial/Ethnic Minorities at Double Jeopardy of Putting off Healthcare during the Pandemic?
Source: MDPI journal article supplement (doi:10.3390/ijerph20021034), 2023-01-06
Supplement: s1 [file s1]

# Supplemental Material

**Table S1.** Pre-pandemic health care activities in Round 9

| Questions                                                                                | Overall |            | Frailty |           |        |                  | Race/Ethnicity |           |                  |
|------------------------------------------------------------------------------------------|---------|------------|---------|-----------|--------|------------------|----------------|-----------|------------------|
|                                                                                          | N       | Percentage | Robust  | Pre-Frail | Frail  | P Value          | White          | Non-White | P Value          |
| In the last year, how did you get to your regular doctor/the doctor?                     |         |            |         |           |        |                  |                |           |                  |
| Drove yourself                                                                           | 2490    | 81.18%     | 82.87%  | 85.27%    | 59.64% | <b>&lt;0.001</b> | 85.06%         | 59.20%    | <b>&lt;0.001</b> |
| A ride from a family member or friend                                                    | 2490    | 21.34%     | 19.37%  | 17.11%    | 43.84% | <b>&lt;0.001</b> | 19.01%         | 34.53%    | <b>&lt;0.001</b> |
| In the last year, did anyone sit in with you and your regular doctor during your visits? | 2490    | 33.33%     | 22.13%  | 31.38%    | 54.18% | <b>&lt;0.001</b> | 32.34%         | 38.97%    | 0.920            |
| Help you with getting on the exam table, dressing, and undressing?                       | 932     | 9.64%      | 4.79%   | 5.20%     | 24.11% | <b>&lt;0.001</b> | 8.53%          | 14.87%    | <b>&lt;0.001</b> |
| Remind you about things you wanted to ask or tell the doctor?                            | 932     | 57.66%     | 45.51%  | 56.29%    | 66.57% | <b>&lt;0.001</b> | 59.03%         | 51.22%    | 0.500            |
| Ask or tell the doctor things for you?                                                   | 929     | 50.71%     | 40.78%  | 46.70%    | 66.06% | <b>&lt;0.001</b> | 50.06%         | 53.76%    | <b>0.010</b>     |
| Help you understand what the doctor was saying?                                          | 932     | 46.81%     | 39.19%  | 43.44%    | 59.44% | <b>&lt;0.001</b> | 45.14%         | 54.66%    | <b>0.012</b>     |
